# Supplementary material for: Promoter-based identification of novel non-coding RNAs reveals the presence of dicistronic snoRNA-miRNA genes in Arabidopsis thaliana
Source: PubMed Central journal article supplement (PMC4660826; doi:10.1186/s12864-015-2221-x), 2015-11-25
Supplement: 12864_2015_2221_MOESM4_ESM.pdf [file 12864_2015_2221_MOESM4_ESM.pdf]

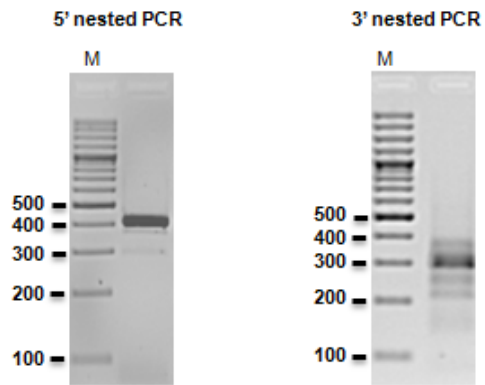

**Figure S2. 5' and 3' RACE mapping of the TSS and TTS in the sno-miR775 gene.** Single major signals in 5' nested RACE PCR (left) and 3' nested RACE PCR (right) indicate the transcription start site (TSS) and transcription termination site (TTS), respectively, of the sno-miR775 gene.
