# Supplementary material for: Promoter-based identification of novel non-coding RNAs reveals the presence of dicistronic snoRNA-miRNA genes in Arabidopsis thaliana
Source: PubMed Central journal article supplement (PMC4660826; doi:10.1186/s12864-015-2221-x), 2015-11-25
Supplement: 12864_2015_2221_MOESM8_ESM.pdf [file 12864_2015_2221_MOESM8_ESM.pdf]

>osa sno-miR827 Chr2:23901290..23900740  
AACCTGTTTTGTTGCTGTCATCTAGCTACCCGTGCATGCCGAGATTGGAGAATAATTGACGATGCAGCAGTCGGCTTATT  
GGCTCTTGGGCACGCGTGGT**TAGATGA****CCATCAGCAAACA**AGTTCCGTGAGACGCATGCATGGTTTCGTCGATTCTCTGGTTC  
ATTTGAGGTGCGCGTCAATAGGAGTTCCTTTTGTATGCTTCTCGATCTGCTCCGTTGACCTCGATCTCGTTAT  
CAGATTCGTGTTTTCTTTTCCCTCCTCCGCTTAAGAAGAAGCAAAGCGGTCGCTTCTTTGCGTGCCCTGCTGTTAAC  
TAGCTACGTCCTGGTTAGGAGTAGTTCTGAATTTGCATTGCAGACTTGCAGTGTGTGCTCTGAAGACGACGCTGCAAAAT  
CGCCGCTCCGTTGCTTAATTACGACAGGTTTGAAGGAACA**CGCGCTGTTGATGTTGCTGATCGTCA****CAATCCGCTGTT**  
**TATCGCTGCTGATG****CGA**AGGAAAAATGACTAGTAGTACCTGGTATGACGA

>osa sno-miR160d Chr3:32454988..32455660  
GGGGAT**ATGCTCGCTCCCTGTATGCCA**CTCGCGTAGCTGCCAACTCAGTTGAAACAACCTGCCTTCTCCCGGCGAGATTCA  
GGCATTGTGTTGCTACTTTGGCTCTACTGCGGATGCGGTGCGAGGAGCCAAAGCATGACCGTCTCTCTGTCTCTATCTCTC  
TCTCATTGACTCATTGTGTGCTCACTAAGATTACACGCTTAATAAACCTGATAAACATGGATCATACGGTAGTTTACTG  
CAGTTTTAGTAGTCTTATTAGTCTTATTACAATTAGTCTCTTTAATTAGTTATGCCCTTGGTTATGGTTCTTATTAGTTGATG  
AGTAGTTATGCTTAATACATATTGCATGCATTTTATTTTCGCTTGTGTGACGCTGTGCATGTTGAGTAAGTGAGCAAACC  
TGTGTATATAGTGTACTAATAGTTCTCTGGTTGATTACACATCTGCATGCAGTCACTTGGTAGCAACTTCTCTGAAAAAAT  
TATTGACAGCCCTAGCTAGTTTGTTCATGTACTGTTGCCACCTTTTCTGATGCAT**GGTAGTCTGA****CTGCTGACATAAATGC**  
**ATGCATATACAATGTTGTCATGGTTTTCTATCTTGTATCTGATTA**GGAGAGGTTAGATTATGGTAGATGCATGAGCTGACCT

>osa sno-miR171c Chr4:31713690..31713430  
TAGTGAGGTGAGAGTACTTGGAGGGAGTGATTGATTGATTGCTGTTTTATCTCT**GATGATTTGCC****TTGTTTCTGCTGATCT**  
**GAATGCTGATCGTTGGGG**ATTGTTCTGCTCTATGTGGAAACGGATTTGGTGGGTTCAATCAGAAAGCTTGTGCTCC  
GAAGCGAGGGCTCCACTCTTTGATTGAGCCGTGCCAATATCACGTCCGCTTTCAGCTGCTCGTTTGTATTGTAAGGATG  
TTTTTTTCATTA

>osa sno-miR1425 Chr5:8862149..8862379  
CTGTTGACTGCAT**TAGGATTCAATCCTTGCTGCT**AAATGTATTGCTTATATTAGCAATAATAATTGTCAGCAGCAAGAAGCTGGA  
CTTTAATATAGTCGATAGTGAAGAACGGTAACATATGGTTTGCAGCAGGTGAGCAGGAT**CGGTGTGGATGATGAATAT**  
**CTCTGTTCA****GTGTTTCATCATCTGACTGAACACTGAATCACTGCTGCTGACGTTA**GAGGTTTCAG

>\_osa sno-miR1850 Chr5:26276162..26275207  
**AGGACGGTGAAGATCGTATCTATTGGTCTCGTTCGTA****ACTGGCAAATGTTTTG****CGCTGCGGACCATCCTGATATATC**  
**ACCACCCATATCCGAGTCT**CTGTAACCAATCAATTTTCGATTCCCTCATGAGATCAGATCTCTTTGGTGATTTCTTTTCGTT  
TGGCTCTTCTTTGGATTCATTGTCAGTTATAT**TGGCCGATGATTA**GATTTAAAATATAGACAAGCATATGCTGAAATTTTCAT  
**GTTGAAAAACCTAATCTCTATGAGGTCAG**ATTTATTGATGCATGTCATGTTGTTGTTATTTTCGTCATCTTTATCCTTTTCG  
TTTTACTTTT**GAGCCCTATGATGATCAATGCGAAACCTTTCTCTGAAA**TCTTGTGAGGACATACCCCTACTGCGCTTCT  
**TCTGAGTCTCT**TATCATTTGTTGGATCTGACTAAAAATCTTATTTGATTTTGTATATGGTTTTAAAAAATATGATTTTTAAGA  
GGTTTGTGCCGATGTGGATGTAATTTGGTTGC**AGGCTGAGTATGAGCAAAAA**TGCATAGTTT**CAGATGATCAAACCCCTAG**  
**TGGTTAATTAAGGAAAAAATAATGTTGTTGAATTTCTAATATGAGCC**TTCCATTCTGCTATCGTATTCTCTAAAAAATTT  
GGTATTTCTGTTGTTAGATTACGTTTAGATTGGTAGATTGCTCTTCC**CGCAGTATGATACAAA**CTTTCAGCTTTAAACG  
**CCAGTTCTGCTTCTGATAATTCATGACAGATAAAGCTGATTCAGATCTGAGCC**AATTGCTGTTCTACTTTTTTCCCATAGGAA  
TAACCTTTGCGTTAGCATCTTTGATCTCTTATTAGCATATATCATTGTTTGAATAATAGCATCATTAATATTT**TA**  
**CCTATGATGAGCTGCCCAATGTTTAGAGGATGATGTTGGCTCGAGTTCCTGTTTATCAGGAAGAACCTACTTGTAGCTGCTG**  
**CATTACATGTTATCAACGGGCTACTGAGG**TCATTAGATTA

>osa sno-miR6250 Chr6:28264615..28265578  
TGTTTTTTTTCTTTTGGTTGAATCGTCTCTCTTGTCTTGTAAAGGTGGGGCCCAATATATCACCATGGTGCCAGCCATCT  
CTGCGAGAA**GGGATAGATCGACGCTCAAG**AAATCGTTTCTGTTGCCATGGCTCCAGTAGGCAATACGATTGTTGCTTGGC  
CAGAGTTCAATCTCTTGTGCAGATCAGTTTCTTCTTCTTTTGGTGGTATCTGTTGTTTATCTGTTGAGTTGTTGTTCTTGC  
**ACGGTCTAACC****CGGCTTGTGGATTCAAATCGCTGAAGAA**GGAAAGCCCAATG**CGCTGTCTAGATCCACCATACC**  
**TCAGTGTGCA****GGTCTGATGCTTCGAGCATGTGATTGATCTGTGTCAGCGTAATGGATACATTT**CAAAAATCAAAATGTTTTT  
TTTTGTCTTCTAATCTCTTTTTCTTGGGAGATTGATAGCTGAT**GGCAGTGAATTTGACATTTA**CCCGCGCTTCTGATTTAA  
**ACCGTGAAGTTAAGGAAAAAATAATGTTGAAATTTCTAATATGAGCC**TTCCATTCTGCTATCGTATTCTCTAAAAAATTT  
GGTATTTCTGTTGTTAGATTACGTTTAGATTGGTAGATTGCTCTTCC**CGCAGTATGATACAAA**CTTTCAGCTTTAAACG  
**CCAGTTCTGCTTCTGATAATTCATGACAGATAAAGCTGATTCAGATCTGAGCC**AATTGCTGTTCTACTTTTTTCCCATAGGAA  
TAACCTTTGCGTTAGCATCTTTGATCTCTTATTAGCATATATCATTGTTTGAATAATAGCATCATTAATATTT**TA**  
**CCTATGATGAGCTGCCCAATGTTTAGAGGATGATGTTGGCTCGAGTTCCTGTTTATCAGGAAGAACCTACTTGTAGCTGCTG**  
**CATTACATGTTATCAACGGGCTACTGAGG**TCATTAGATTA

>osa sno-miR166b Chr6:30327320..30326924  
AGCAAGCAAGCAAAAGTTATCTAGCTAAAGAGGGAGCCTTTTCATTTTGGAG**GGATGTTGCTGGCTCGGG**CTACTTTTAA  
TTTTCTCTCTTTTATATCTTTCTTCTCGATCCTAGCTTATCTTTGATCTCTCAAATCGATCTTAAAGAAAAAGATCAGTC  
AAAGAGATGAGAGTAGATGCTGTAGATCTCGGACCAGGCTTCAATCCCCCAACAGAAAGGCTCCCATGCATATCGATCAT  
GAGCTAGCTTATTACCCCTGCTTTTGCCTCT**TCCAATCTGATGA**ACTGGGTAAGTTAACTGAATATTGCTTAACTAATCAG  
CTTTTTGTTT**CATCTGATGGA**TAGATAGGAGGAGTAGATCTTGGTGGCATGAACTGCATGAG

**Figure S5. Sequence features of sno-miRNA genes in *Oryza Sativa*.** Mature miRNAs are in purple. Mature snoRNAs are in bold. C/D and H/ACA boxes are in red. Inverted repeats predicted as the 5' and 3' termini are underlined.
